# Supplementary material for: Langmuir Adsorption Kinetics in Liquid Media: Interface Reaction Model
Source: PubMed Central journal article supplement — ACS Omega. 2021 May 26;6(22):14481–92. doi: 10.1021/acsomega.1c01449 (PMC8190925; doi:10.1021/acsomega.1c01449), 2021-05-26
Supplement: ao1c01449_si_001.pdf [file ao1c01449_si_001.pdf]

## **Supporting Information (SI)**

### **Langmuir adsorption kinetics in liquid media: interface reaction model**

Md Akhtarul Islam\*, Myisha Ahmed Chowdhury, Md. Salatul Islam Mozumder, Md. Tamez  
Uddin\*

Center for Environmental Process Engineering, Department of Chemical Engineering and  
Polymer Science, Shahjalal University of Science and Technology (SUST), Sylhet-3114,  
Bangladesh.

\*E-mail: [islamsust@yahoo.com](mailto:islamsust@yahoo.com); [mislam@sust.edu](mailto:mislam@sust.edu), [mtuddin-cep@sust.edu](mailto:mtuddin-cep@sust.edu)

## Appendix A: Conversion of standard equations for saturation type curves into PFO and PSO kinetic equations

*Standard Equation I for saturation type curves:*

Linearizing Eq.(7) from the main text, we have

$$-\ln\left(1 - \frac{q}{q_e}\right) = at \quad (\text{S1})$$

With  $a = k_{E1}$ , the Eq. (S1) is identical with the linearized pseudo-first-order (PFO) kinetic equation (Eq. (4)) in EA.

Differentiating the Eq. (7) with respect to  $t$ , we have

$$\frac{dq}{dt} = q_e(ae^{-at}) \quad (\text{S2})$$

Combining Eqs. (7) & (S2), we have

$$\frac{dq}{dt} = a(q_e - q) \quad (\text{S3})$$

Again, with  $a = k_{E1}$ , the Eq. (S3) is identical with the pseudo-first-order (PFO) kinetic equation in differential form (Eq. (3)) in EA.

*Standard Equation II for saturation type curves:*

Linearizing Eq.(8) we have

$$\frac{t}{q} = \frac{1}{bq_e} + \frac{1}{q_e}t \quad (\text{S4})$$

For  $b = k_{E2}q_e$ , the Eq. (S4) is identical with the linearized pseudo-second-order (PSO) kinetic equation (Eq. (6)) in EA.

Differentiating the Eq. (8) with respect to  $t$ , we have

$$\frac{dq}{dt} = q \frac{b}{e} \frac{1}{(1 + bt)^2} \quad (\text{S5})$$

Combining Eq. (8) & (S5), we have

$$\frac{dq}{dt} = \frac{b}{q_e} (q_e - q)^2 \quad (\text{S6})$$

Again, for  $b = k_{E2}q_e$ , the Eq. (S6) is identical with the pseudo-second-order (PSO) kinetic equation in differential form (Eq. (5)) in EA.

### Appendix B: Derivation of kinetic equation (Eq. (22)) in Hybrid Order Approach (HOA)

Rearranging Eq. (15) from the main text, we have

$$W \frac{dq}{dt} = k_a w_a q^2 - (k_a q_\infty w_a + k_a C_{A,0} + k_d) q + k_a C_{A,0} q_\infty \quad (\text{S7})$$

Rewriting the Eq. (S7) for equilibrium:

$$0 = k_a w_a q_e^2 - (k_a q_\infty w_a + k_a C_{A,0} + k_d) q_e + k_a C_{A,0} q_\infty \quad (\text{S8})$$

Subtracting Eq. (S8) from Eq. (S7) and after simple algebraic manipulation, one obtains,

$$\begin{aligned} W \frac{dq}{dt} &= k_a w_a (q_e - q)^2 - k_a w_a \cdot 2q_e (q_e - q) \\ &\quad + k_a (q_\infty w_a + C_{A,0} + 1/K) (q_e - q) \end{aligned} \quad (\text{S9})$$

Rearranging Eq. (19), we have

$$w_a \cdot 2q_e = (q_\infty w_a + C_{A,0} + 1/K) - \sqrt{\Delta} \quad (\text{S10})$$

Inserting Eq. (S10) in Eq. (S9), we obtain Eq. (22).

$$\frac{dq}{dt} = k_{H1} (q_e - q) + k_{H2} (q_e - q)^2 \quad (\text{22})$$

**Appendix C: Derivation of the expression for the dimensionless number,  $N_{OD,0}$  (Eq. (40))**

Rearranging the Eq. (21), one obtains

$$\frac{\sqrt{\Delta}}{w_a q_e} = \frac{q_\infty}{q_e} + \frac{C_{A,0}}{w_a q_e} + \frac{1}{K} \frac{1}{w_a q_e} - 2 \quad (\text{S11})$$

Combining Eqs. (39) and (S11), we have

$$N_{OD,0} = \frac{q_\infty}{q_e} + \frac{C_{A,0}}{w_a q_e} + \frac{1}{K} \frac{1}{w_a q_e} - 2 \quad (\text{S12})$$

Rearranging the Eq. (1), we have

$$\frac{1}{K} = C_{A,e} \left( \frac{q_\infty}{q_e} - 1 \right) \quad (\text{S13})$$

Inserting Eq. (S13) in Eq(S12), we have

$$N_{OD,0} = \frac{q_\infty}{q_e} + \frac{C_{A,0}}{w_a q_e} + \frac{C_{A,e}}{w_a q_e} \left( \frac{q_\infty}{q_e} - 1 \right) - 2 \quad (\text{S14})$$

From the material balance at equilibrium:

$$V C_{A,e} + W q_e = V C_{A,0} \quad (\text{S15})$$

Rearranging Eq. (S15), we can write

$$\frac{C_{A,e}}{w_a q_e} = \frac{C_{A,0}}{w_a q_e} - 1 \quad (\text{S16})$$

Inserting Eq. (S16) in Eq. (S14), we have

$$N_{OD,0} = \frac{q_\infty}{q_e} + \frac{C_{A,0}}{w_a q_e} + \left( \frac{C_{A,0}}{w_a q_e} - 1 \right) \left( \frac{q_\infty}{q_e} - 1 \right) - 2 \quad (\text{S17})$$

In terms of Dimensionless numbers,  $N_1$  and  $N_2$ , the Eq. (S17) will take the form of Eq. (40).

$$N_{OD,0} = \frac{\sqrt{\Delta}}{w_a q_e} = \frac{1}{N_1} + \frac{1}{N_2} + \left( \frac{1}{N_1} - 1 \right) \left( \frac{1}{N_2} - 1 \right) - 2 \quad (\text{40})$$

**Appendix D: Validation of IRA and HOA for systems 2c, 3a & 4a**

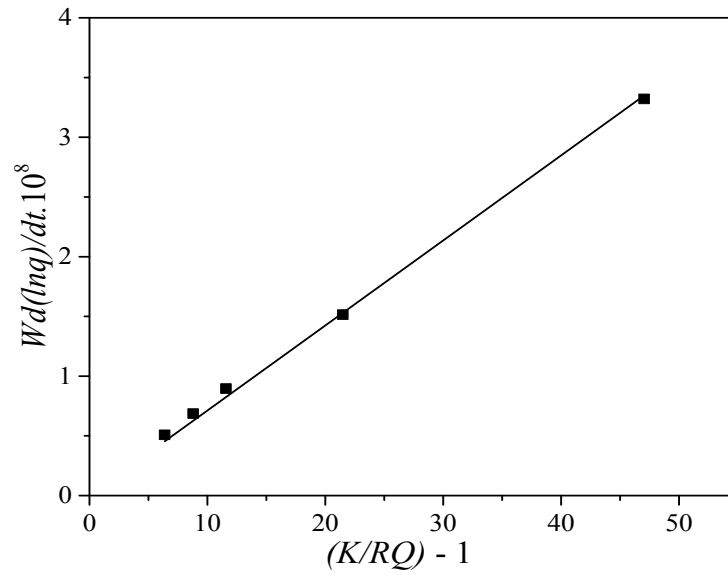

Figure S1: IRA validation (Eq. (17)):  $W \frac{d \ln q}{dt}$  vs.  $\left[ \frac{K}{RQ} - 1 \right]$  plot for the System 2c

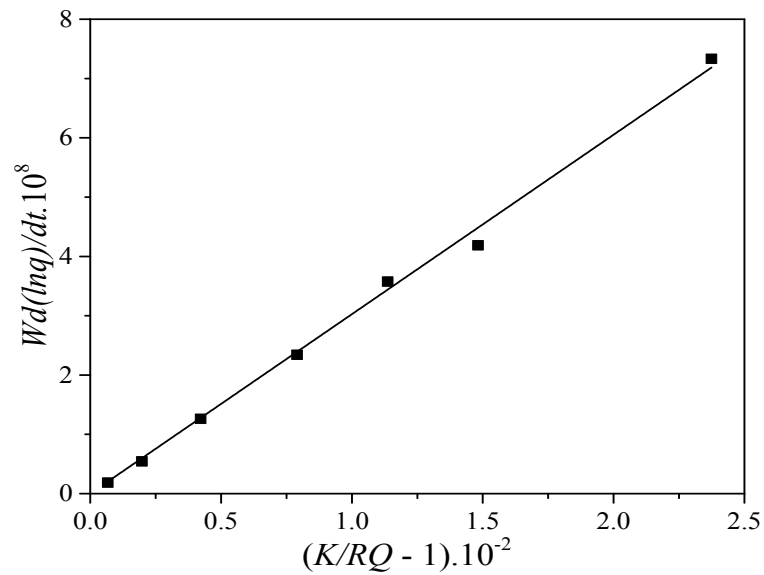

Figure S2: IRA validation (Eq. (17)):  $W \frac{d \ln q}{dt}$  vs.  $\left[ \frac{K}{RQ} - 1 \right]$  plot for the System 3a

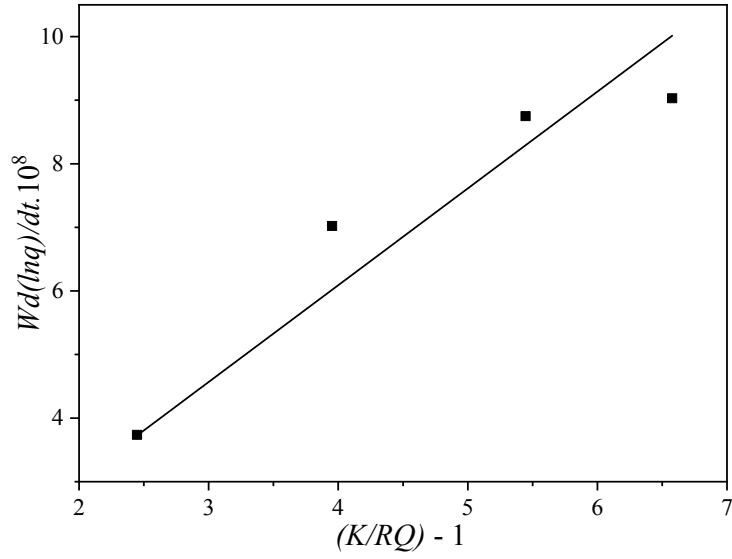

Figure S3: IRA validation (Eq. (17)):  $W \frac{d \ln q}{dt}$  vs.  $\left[ \frac{K}{RQ} - 1 \right]$  plot for the System 4a

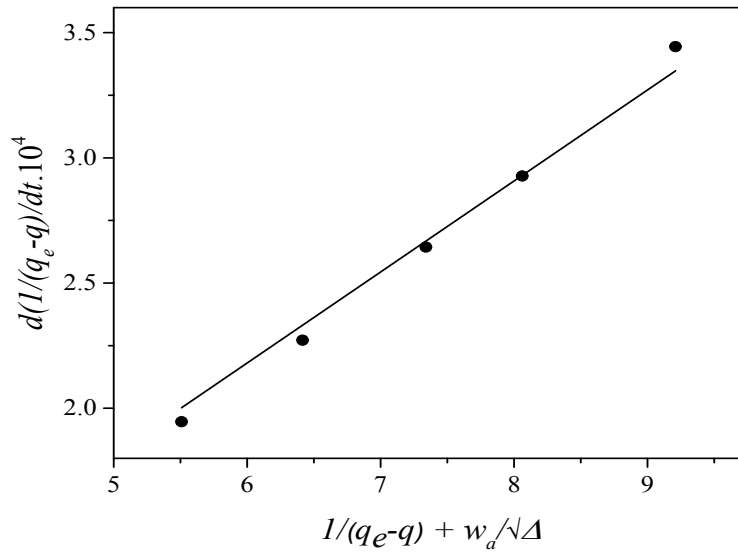

Figure S4: HOA validation (Eq. (26)):  $d(1/(q_e - q))/dt$  vs.  $\left[ \frac{1}{(q_e - q)} + \frac{w_a}{\sqrt{\Delta}} \right]$  plot for the System 2c

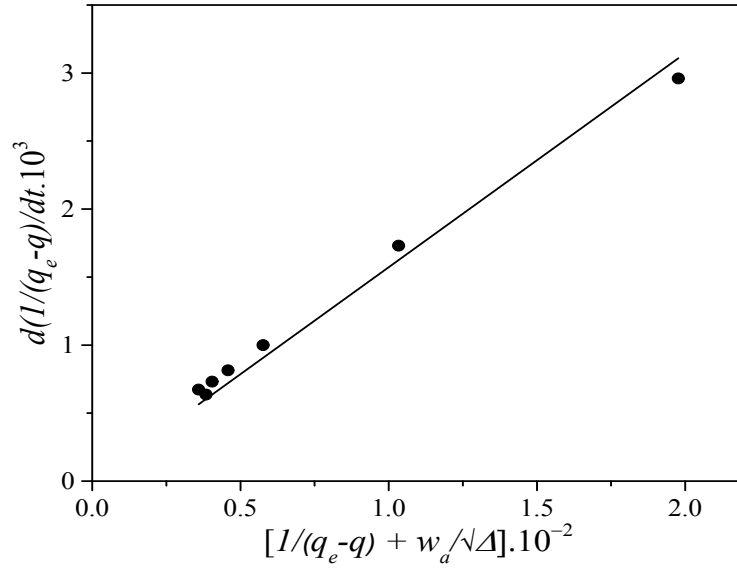

Figure S5: HOA validation (Eq. (26)):  $d(1/(q_e-q))/dt$  vs  $\left[\frac{1}{(q_e-q)} + \frac{w_a}{\sqrt{\Delta}}\right]$  plot for the System 3a

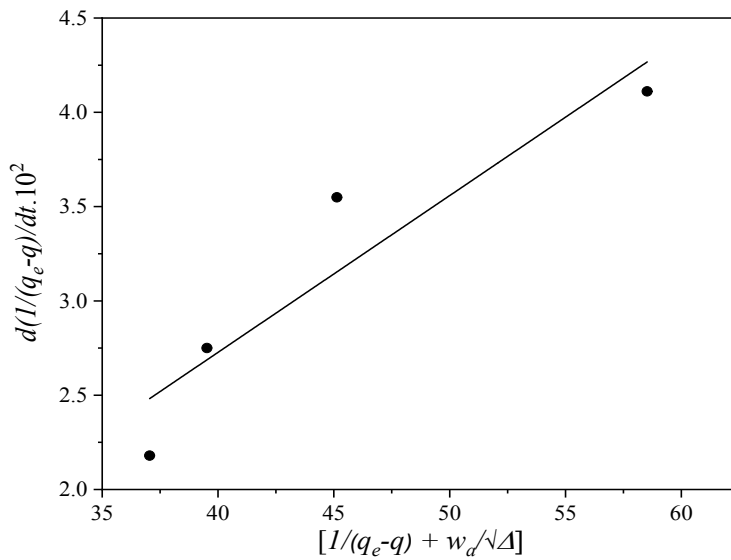

Figure S6: HOA validation (Eq. (26)):  $d(1/(q_e-q))/dt$  vs  $\left[\frac{1}{(q_e-q)} + \frac{w_a}{\sqrt{\Delta}}\right]$  plot for the System 4a

**Appendix E: Validation of PFO and PSO kinetics in EA for the system 2c , 3a and 4c**

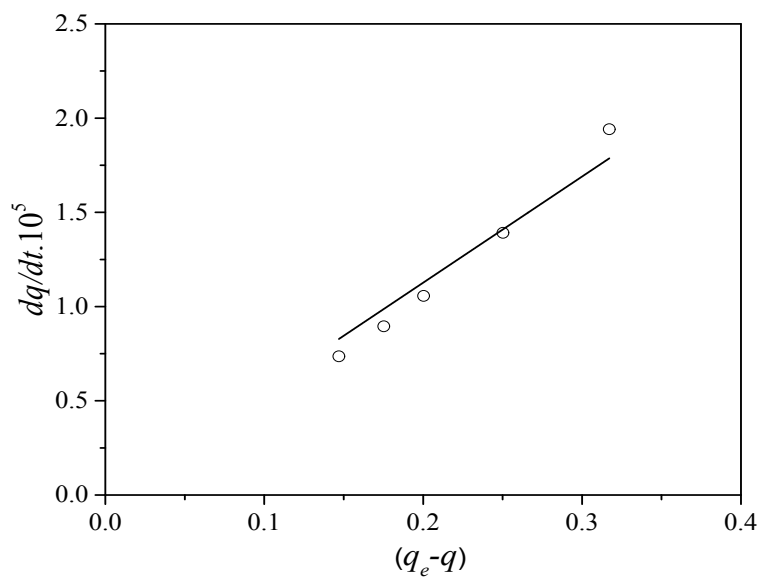

Figure S7:  $dq/dt$  vs.  $(q_e - q)$  plot (Eq. (3)) for the System 2c

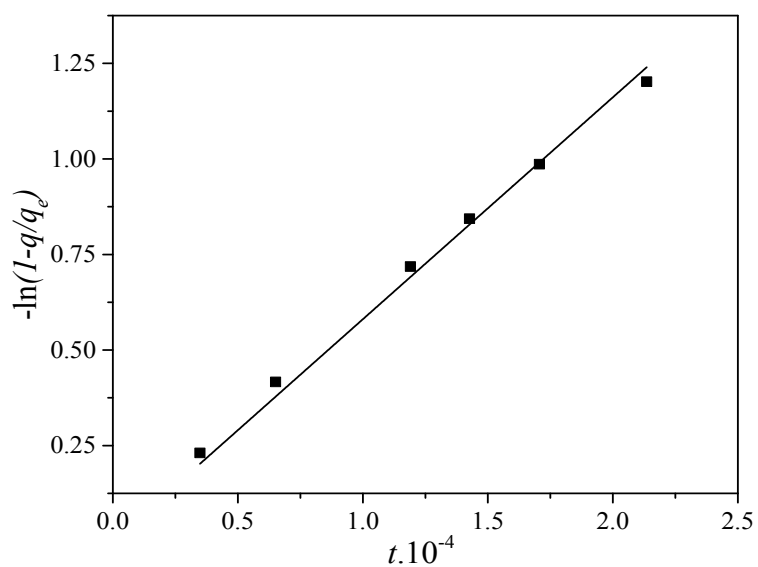

Figure S8:  $-\ln(1 - q/q_e)$  vs.  $t$  plot (Eq. (4)) for the System 2c



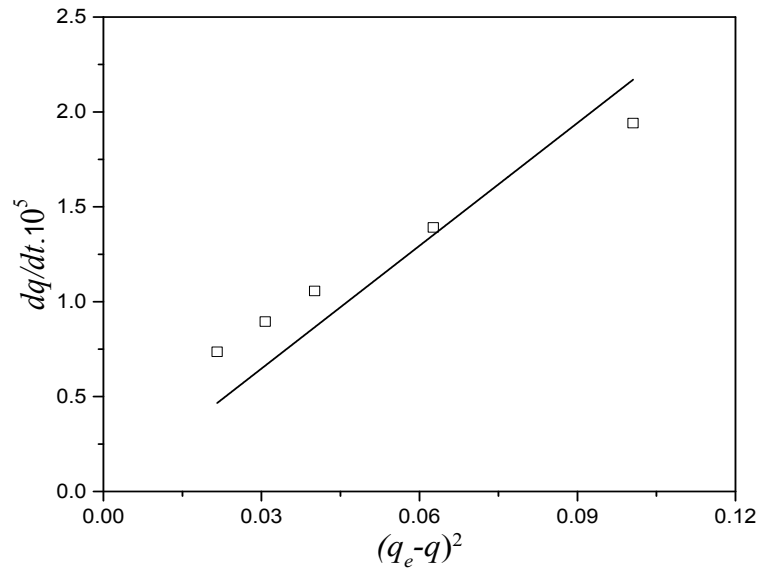

Figure S9:  $dq/dt$  vs.  $(q_e - q)^2$  plot (Eq. (5)) for the System 2c

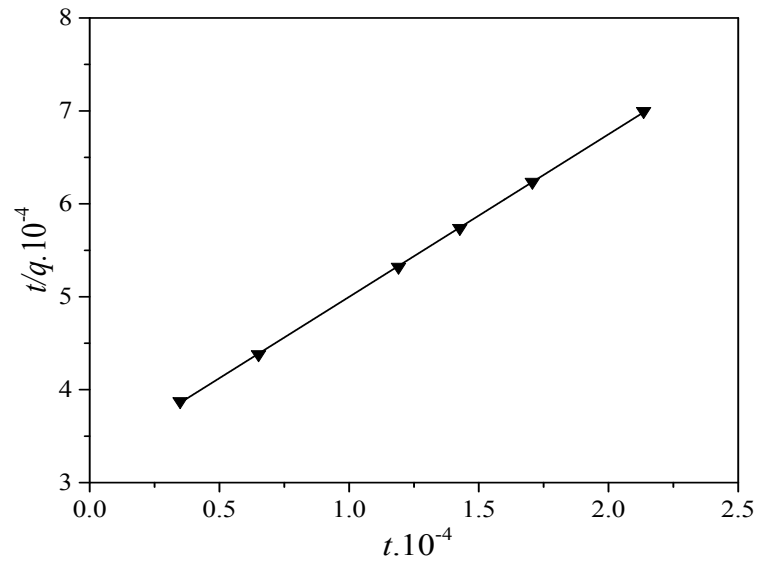

Figure S10:  $t/q$  vs.  $t$  plot (Eq. (6)) for the System 2c

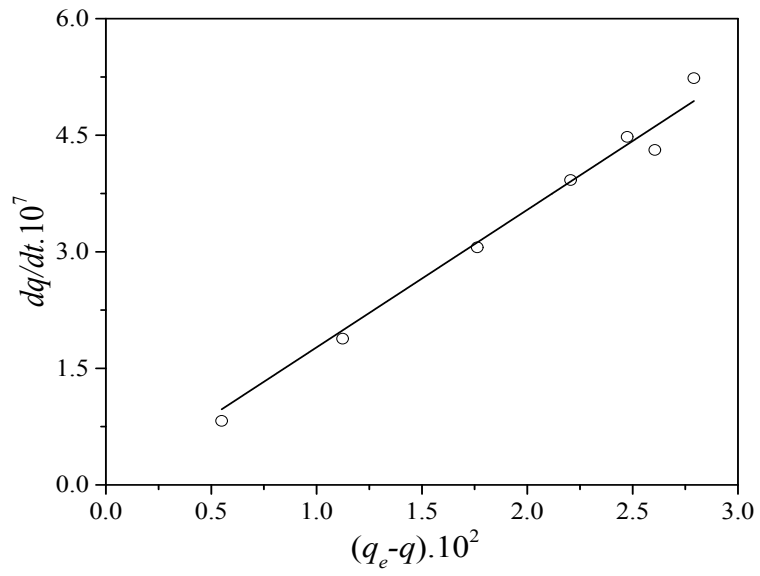

Figure S11:  $dq/dt$  vs.  $(q_e - q)$  plot (Eq. (3)) for the System 3a

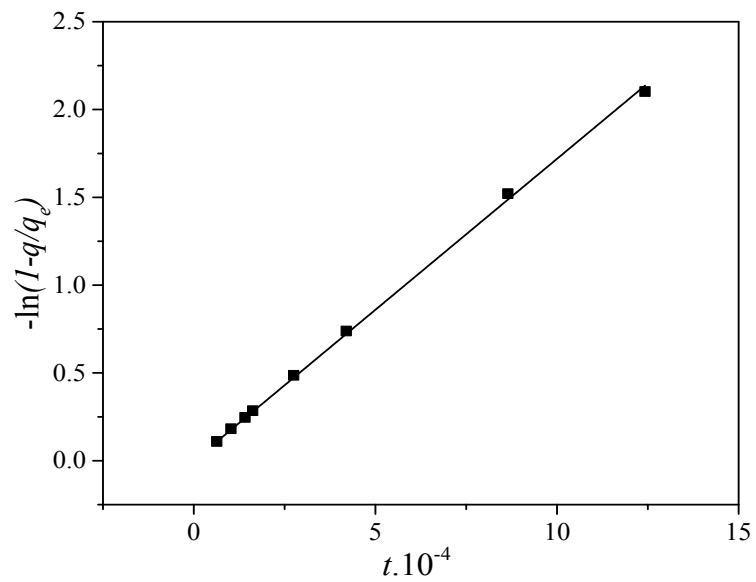

Figure S12:  $-\ln(1-q/q_e)$  vs.  $t$  plot (Eq. (4)) for the System 3a

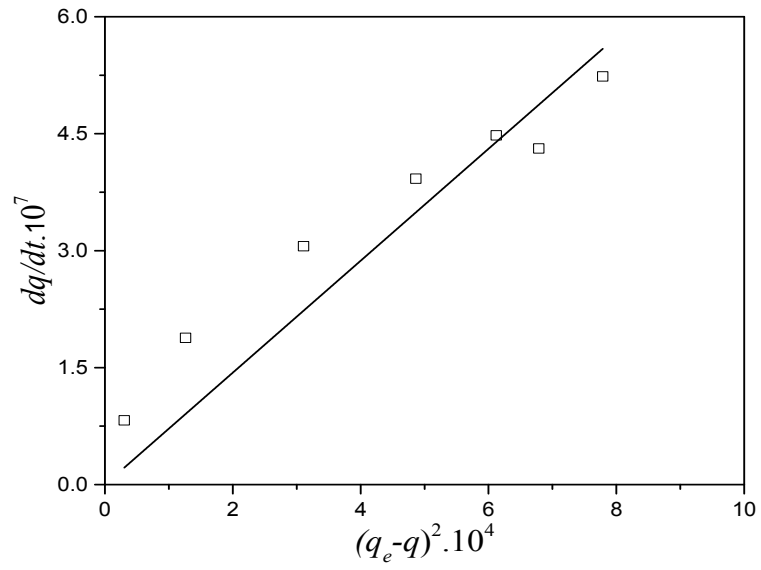

Figure S13:  $dq/dt$  vs.  $(q_e - q)^2$  plot (Eq. (5)) for the System 3a

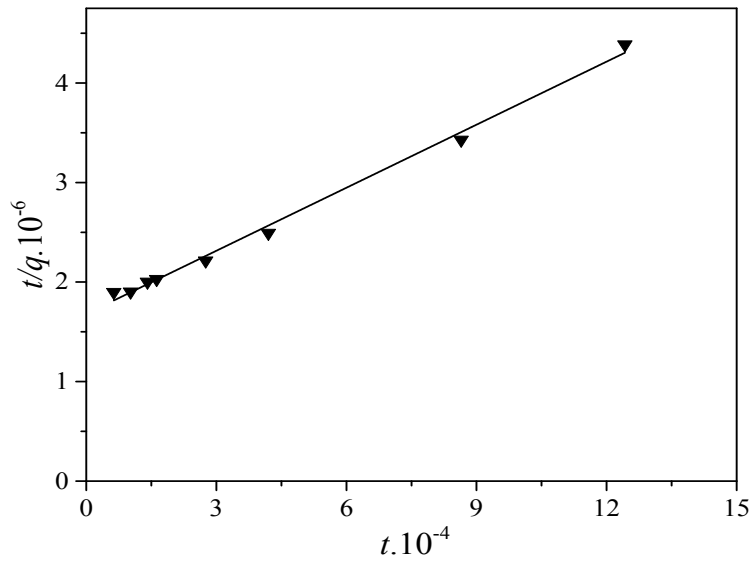

Figure S14:  $t/q$  vs.  $t$  plot (Eq. (6)) for the System 3a

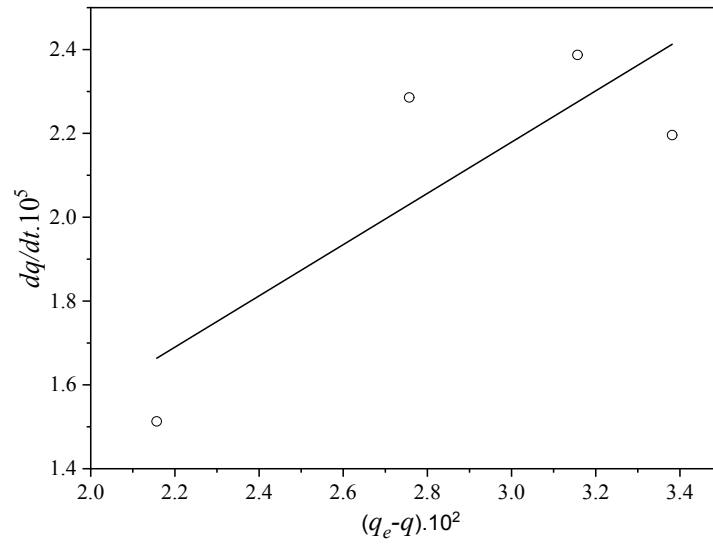

Figure S15:  $dq/dt$  vs.  $(q_e - q)$  plot (Eq. (3)) for the System 4a

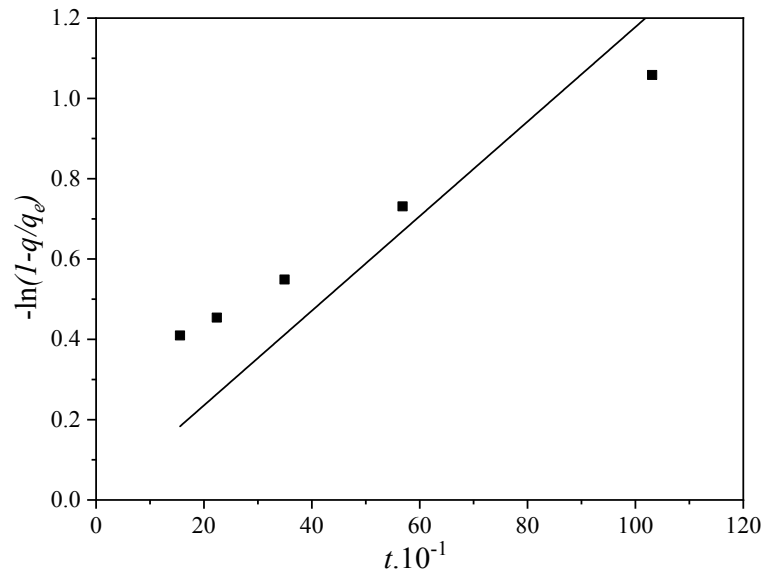

Figure S16:  $-\ln(1 - q/q_e)$  vs.  $t$  plot (Eq. (4)) for the System 4a

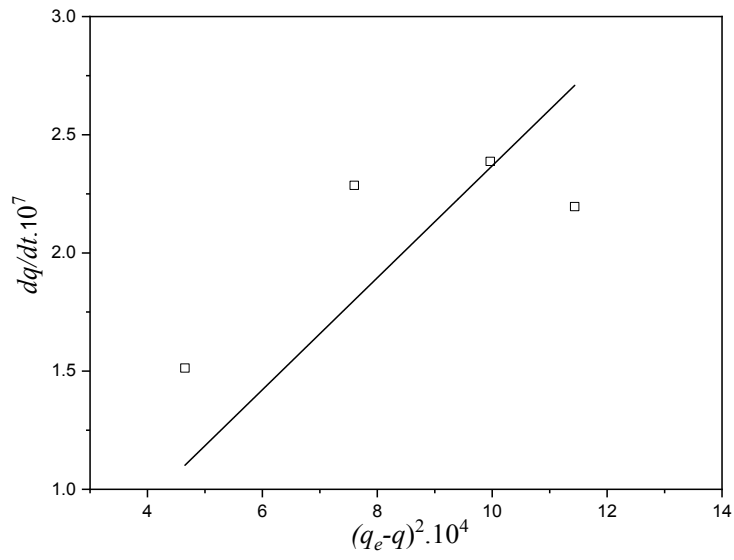

Figure S17:  $dq/dt$  vs.  $(q_e - q)^2$  plot (Eq. (5)) for the System 4a

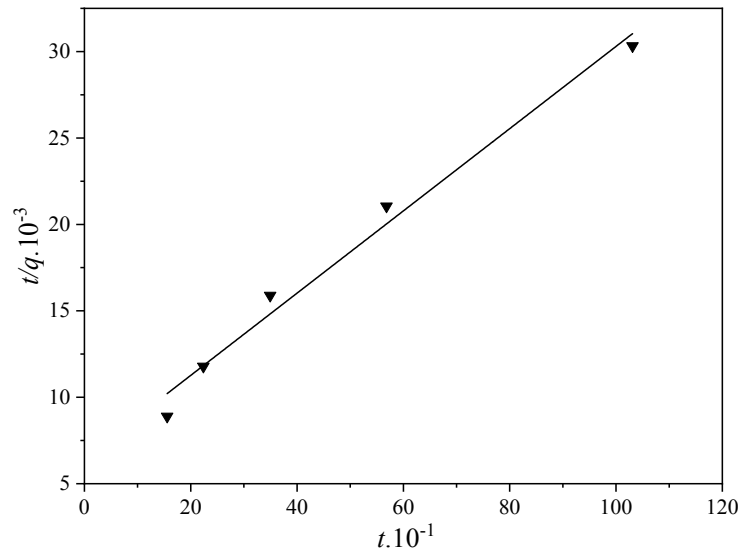

Figure S18:  $t/q$  vs.  $t$  plot (Eq. (6)) for the System 4a

**Table S1:** Pseudo-rate constants obtained from linear fit to: i)  $-\ln(I-q/q_e)$  vs.  $t$  (Eq. (4)) and ii)  $dq/dt$  vs.  $(q_e - q)$  (Eq. (3)) plots for PFO kinetics, and iii)  $t/q$  vs.  $t$  (Eq. (6)) and iv)  $dq/dt$  vs.  $(q_e - q)^2$  (Eq. (5)) plots for PSO kinetics

| ↓Systems<br>↓   | For PFO kinetics, fit to:                  |                                            |                                            | For PSO kinetics, fit to:                  |                                            |                                            |
|-----------------|--------------------------------------------|--------------------------------------------|--------------------------------------------|--------------------------------------------|--------------------------------------------|--------------------------------------------|
|                 | Eq. (4)<br>(in source)                     | Eq. (4)<br>(this work)                     | Eq. (3)<br>(this work)                     | Eq. (6)<br>(in source)                     | Eq. (6)<br>(this work)                     | Eq. (5)<br>(this work)                     |
| Parameter<br>r→ | $K_{E1} \times 10^5$<br>(R <sup>2</sup> =) | $K_{E1} \times 10^5$<br>(R <sup>2</sup> =) | $K_{E1} \times 10^5$<br>(R <sup>2</sup> =) | $K_{E2} \times 10^4$<br>(R <sup>2</sup> =) | $K_{E2} \times 10^4$<br>(R <sup>2</sup> =) | $K_{E2} \times 10^4$<br>(R <sup>2</sup> =) |
| System 1a       | 33.3<br>(0.97)                             | 46.5<br>(0.99)                             | 39.3<br>(0.98)                             | 11600<br>(1.00)                            | 9980<br>(0.97)                             | 7700<br>(0.90)                             |
| System 1b       | 31.7<br>(0.99)                             | 44.7<br>(0.99)                             | 38.5<br>(0.99)                             | 6690<br>(1.00)                             | 4730<br>(0.99)                             | 4090<br>(0.88)                             |
| System 1c       | 23.3<br>(0.99)                             | 37.7<br>(0.99)                             | 36.6<br>(0.99)                             | 2730<br>(1.00)                             | 2515<br>(0.99)                             | 2980<br>(0.96)                             |
| System 2a       | 5.43<br>(0.99)                             | 7.19<br>(1.00)                             | 7.22<br>(0.98)                             | 2.55<br>(0.99)                             | 2.11<br>(1.00)                             | 6.62<br>(0.77)                             |
| System 2b       | 4.80<br>(0.99)                             | 5.79<br>(1.00)                             | 5.55<br>(0.98)                             | 1.35<br>(0.97)                             | 1.32<br>(1.00)                             | 3.44<br>(0.67)                             |
| System 2c       | 5.08<br>(1.00)                             | 5.77<br>(0.98)                             | 5.63<br>(0.95)                             | 1.02<br>(0.99)                             | 0.94<br>(1.00)                             | 2.16<br>(0.76)                             |
| System 3a       | 1.73                                       | 1.72<br>(1.00)                             | 1.77<br>(0.98)                             | 3.08<br>-                                  | 2.21<br>(1.00)                             | 7.18<br>(0.82)                             |

|              |                |                |                |               |                |                |
|--------------|----------------|----------------|----------------|---------------|----------------|----------------|
| System<br>3b | 1.80           | 1.78<br>(1.00) | 1.74<br>(0.91) | 2.72<br>-     | 1.90<br>(0.99) | 5.67<br>(0.57) |
| System<br>3c | 1.86           | 1.83<br>(1.00) | 1.83<br>(0.81) | 2.37          | 1.87<br>(0.99) | 4.89<br>(0.50) |
| System<br>4a | 103<br>(0.95)  | 118<br>(0.94)  | 72.9<br>(0.99) | 420<br>(0.99) | 670<br>(0.98)  | 273<br>(0.96)  |
| System<br>4b | 96.7<br>(0.99) | 105<br>(0.98)  | 97.9<br>(0.99) | 445<br>(0.99) | 344<br>(0.99)  | 469<br>(0.97)  |
| System<br>4c | 88.3<br>(0.96) | 132<br>(0.98)  | 141<br>(0.99)  | 498<br>(0.99) | 372<br>(0.99)  | 921<br>(0.96)  |

(R<sup>2</sup>=): correlation coefficient of curve-fitting
